# Supplementary material for: REC8 suppresses tumor angiogenesis by inhibition of NF-κB-mediated vascular endothelial growth factor expression in gastric cancer cells
Source: PubMed Central journal article supplement (PMC7507279; doi:10.1186/s40659-020-00307-1), 2020-09-21

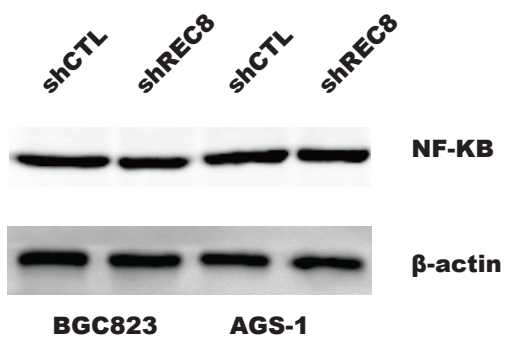

Supplement: 40659_2020_307_MOESM1_ESM.pdf [file 40659_2020_307_MOESM1_ESM.pdf]
